# Supplementary material for: Metabolism of Imidazole Dipeptides, Taurine, Branched-Chain Amino Acids, and Polyamines of the Breast Muscle Are Affected by Post-Hatch Development in Chickens
Source: MDPI journal article supplement (doi:10.3390/metabo12010086), 2022-01-17
Supplement: s1 [file s1]

**Table S8.** Retention time and instrument settings for the analyzed compounds.

| Compound<br>name                                | Retention time<br>(min) | Q1<br>(m/z) | Q2<br>(m/z) | Dwell<br>(s) | Cone voltage<br>(V) | Collision energy<br>(V) |
|-------------------------------------------------|-------------------------|-------------|-------------|--------------|---------------------|-------------------------|
| Histidine ring ( <sup>13</sup> C <sub>1</sub> ) | 1.7                     | 327.3       | 171.0       | 0.128        | 24                  | 21                      |
| Taurine                                         | 2.3                     | 296.1       | 171.0       | 0.061        | 18                  | 15                      |
| Glutamine (d <sub>5</sub> )                     | 2.8                     | 322.2       | 171.0       | 0.061        | 22                  | 24                      |
| Carnosine                                       | 2.8                     | 397.2       | 171.0       | 0.061        | 24                  | 21                      |
| Anserine                                        | 3.1                     | 411.3       | 171.0       | 0.128        | 24                  | 21                      |
| Balenine                                        | 3.3                     | 411.3       | 171.0       | 0.128        | 24                  | 21                      |
