# Supplementary material for: Metabolism of Imidazole Dipeptides, Taurine, Branched-Chain Amino Acids, and Polyamines of the Breast Muscle Are Affected by Post-Hatch Development in Chickens
Source: MDPI journal article supplement (doi:10.3390/metabo12010086), 2022-01-17
Supplement: s1 [file s1]

**Table S2.** Metabolites decreased during postnatal development in the breast muscle of chickens

|                       |   | P7   |       |       |    | P28  |      |      |    | P42  |      |      | KW              |
|-----------------------|---|------|-------|-------|----|------|------|------|----|------|------|------|-----------------|
|                       |   | Q1   | Q2    | Q3    |    | Q1   | Q2   | Q3   |    | Q1   | Q2   | Q3   | <i>p</i> -value |
| 3-Hydroxybutyric acid | A | 78.8 | 93.4  | 124.5 | AB | 47.7 | 55.6 | 79.5 | B  | 49.6 | 67.5 | 68.5 | <0.05           |
| Glyceric acid         | A | 64.4 | 101.1 | 135   | AB | 40.3 | 52.8 | 75.3 | B  | 21.6 | 32.7 | 36.1 | <0.05           |
| Lysine                | A | 57.5 | 102.8 | 141.1 | AB | 24.3 | 43.5 | 58.3 | B  | 14.5 | 18.9 | 26.6 | <0.05           |
| meso-Erythritol       | A | 86   | 101.9 | 113   | AB | 56.7 | 65.6 | 73.7 | B  | 43.9 | 45.1 | 56.5 | <0.05           |
| Myristic acid         | A | 89.6 | 93.8  | 113.5 | AB | 73.1 | 75.8 | 98.7 | B  | 60.9 | 70.9 | 75.6 | <0.05           |
| Tyrosine              | A | 76.3 | 107.8 | 119.8 | AB | 46.3 | 57.4 | 73.8 | B  | 45.7 | 50.4 | 69.1 | <0.05           |
| Methionine            | A | 66.8 | 100.0 | 133.2 | B  | 36.9 | 46.2 | 59.0 | AB | 39.1 | 49.6 | 64.1 | <0.05           |
| Pantothenic acid      | A | 88.8 | 99.0  | 111.7 | B  | 47.4 | 60.6 | 69.9 | AB | 60.2 | 64.0 | 88.0 | <0.05           |
| Sorbose               | A | 35.4 | 89.6  | 169.8 | B  | 14.9 | 20.5 | 26.7 | AB | 13.7 | 16.1 | 39.9 | <0.05           |
| 15-Anhydro-glucitol   | A | 43.7 | 93.6  | 159.5 | B  | 17.5 | 23.1 | 31.4 | B  | 10   | 15.2 | 21.2 | <0.05           |
| 2-Aminobutyric acid   | A | 74.5 | 91.9  | 129.6 | B  | 43.1 | 48.2 | 53.4 | B  | 34.5 | 37.2 | 43.3 | <0.05           |
| 4-Hydroxyproline      | A | 80.8 | 95.8  | 121.4 | B  | 17.9 | 20.8 | 27.0 | B  | 17.8 | 19.7 | 28.3 | <0.05           |
| 5-Oxoproline          | A | 80.9 | 104.6 | 116.8 | B  | 27.6 | 30.5 | 38.9 | B  | 28.6 | 32.0 | 36.2 | <0.05           |
| Alanine               | A | 90   | 98.7  | 110.6 | B  | 16.4 | 18.9 | 21.5 | B  | 15.9 | 18.0 | 19.4 | <0.05           |
| Arginine              | A | 70.2 | 99.0  | 130.3 | B  | 16.3 | 18.4 | 25.0 | B  | 13.3 | 17.6 | 23.7 | <0.05           |
| Ascorbic acid         | A | 84.4 | 95.2  | 118.0 | B  | 45.6 | 50.7 | 51.8 | B  | 44.1 | 51.7 | 59.0 | <0.05           |
| Citric acid           | A | 91.1 | 98.1  | 109.9 | B  | 65.3 | 73.9 | 81.2 | B  | 63.2 | 67.1 | 70.6 | <0.05           |
| Cystathionine         | A | 53.9 | 57.8  | 167.2 | B  | 0.2  | 0.4  | 0.6  | B  | 0.1  | 0.2  | 0.5  | <0.05           |
| Fumaric acid          | A | 78.8 | 96.7  | 122.8 | B  | 28.4 | 35.7 | 45.2 | B  | 35.8 | 44.0 | 49.5 | <0.05           |
| Galactose             | A | 80.8 | 99.9  | 119.3 | B  | 43.2 | 55.8 | 70.1 | B  | 52.3 | 53.9 | 62.4 | <0.05           |
| Glutamic acid         | A | 83.2 | 103.6 | 115   | B  | 29.1 | 32.3 | 40.7 | B  | 29.8 | 34.4 | 39.0 | <0.05           |
| Glutamine             | A | 74.8 | 98.3  | 126   | B  | 17.2 | 21.9 | 24.2 | B  | 15.4 | 15.5 | 20.1 | <0.05           |
| Glycine               | A | 78.4 | 98.6  | 122.3 | B  | 14.9 | 17.4 | 21.9 | B  | 17.3 | 27.8 | 31.3 | <0.05           |
| Homocysteine          | A | 82.6 | 91.0  | 121.9 | B  | 3.3  | 4.2  | 6.7  | B  | 1.8  | 2.6  | 7.3  | <0.05           |
| Homocystine           | A | 53.9 | 69.7  | 161.3 | B  | 1.2  | 3.6  | 9.7  | B  | 4.7  | 8.1  | 11.5 | <0.05           |
| Hypotaurine           | A | 73.5 | 85.6  | 133.7 | B  | 20.4 | 25.9 | 34.9 | B  | 20   | 24.6 | 28.9 | <0.05           |
| Inositol              | A | 91.4 | 98.9  | 109.1 | B  | 39.5 | 46.5 | 56.6 | B  | 38.8 | 42.9 | 49.2 | <0.05           |
| Isoleucine            | A | 85.0 | 98.1  | 115.9 | B  | 44.4 | 49.7 | 51.4 | B  | 41   | 44.5 | 54.8 | <0.05           |
| Lactose               | A | 42.8 | 109.5 | 152.5 | B  | 8.3  | 10.7 | 16.5 | B  | 9.9  | 12.8 | 16.0 | <0.05           |

P7, P28, and P42; 7, 28, and 42 days of age, respectively. Q1, Q2, and Q3; lower quartile, median quartile, and upper quartile, respectively. KW, Kruskal-Wallis test; Different letters in the same line denote significantly different according to Steel-Dwass test ( $p < 0.05$ ). The unit for metabolites is the relative value. n=5 in each group.

Table S2. (continued)

|                |   | P7   |       |       |   | P28  |      |      |   | P42  |      |      | KW              |
|----------------|---|------|-------|-------|---|------|------|------|---|------|------|------|-----------------|
|                |   | Q1   | Q2    | Q3    |   | Q1   | Q2   | Q3   |   | Q1   | Q2   | Q3   | <i>p</i> -value |
| Leucine        | A | 60.5 | 100.4 | 139.3 | B | 24.5 | 34.0 | 40.2 | B | 25.7 | 38.7 | 47.1 | <0.05           |
| Malic acid     | A | 76.3 | 90.5  | 128.5 | B | 31.5 | 33.1 | 49.0 | B | 34.5 | 42.9 | 51.7 | <0.05           |
| Malonic acid   | A | 77.2 | 98.1  | 123.8 | B | 12.8 | 24.8 | 46.4 | B | 12.5 | 31.7 | 35.7 | <0.05           |
| Maltose        | A | 50.3 | 85.9  | 156.7 | B | 9.4  | 10.4 | 14.6 | B | 7.0  | 9.8  | 12.5 | <0.05           |
| Mannitol       | A | 80.9 | 95.5  | 121.4 | B | 9.8  | 12.0 | 19.3 | B | 9.8  | 10.4 | 25.3 | <0.05           |
| Margaric acid  | A | 66.4 | 93.4  | 136.9 | B | 21.3 | 24.0 | 33.5 | B | 18.8 | 24.7 | 26.1 | <0.05           |
| Ornithine      | A | 75.7 | 94.0  | 127.3 | B | 17.8 | 21.2 | 27   | B | 15.2 | 20.2 | 24.2 | <0.05           |
| Phenylalanine  | A | 90.9 | 99.1  | 109.5 | B | 25.7 | 30.0 | 30.7 | B | 29.2 | 32.3 | 37   | <0.05           |
| Proline        | A | 86.5 | 95.4  | 115.8 | B | 8.4  | 14.8 | 19.8 | B | 8.6  | 9.9  | 12.3 | <0.05           |
| Putrescine     | A | 66.7 | 94.3  | 136.1 | B | 18.9 | 22.6 | 28   | B | 11.3 | 15.5 | 17.8 | <0.05           |
| Ribonic acid   | A | 24.6 | 103.5 | 173.6 | B | 1.2  | 1.6  | 5.5  | B | 0.1  | 1.4  | 3.7  | <0.05           |
| Sarcosine      | A | 69.4 | 96.7  | 132.3 | B | 9.4  | 13.4 | 29.9 | B | 8.0  | 10.3 | 11.3 | <0.05           |
| Serine         | A | 86.1 | 103.0 | 112.4 | B | 22.8 | 24.9 | 34.9 | B | 21.5 | 23.5 | 26.6 | <0.05           |
| Spermidine     | A | 70.7 | 110.8 | 123.9 | B | 30.8 | 37.3 | 38.8 | B | 14.7 | 24.6 | 27.3 | <0.05           |
| Threonic acid  | A | 50.6 | 60.0  | 169.4 | B | 8.9  | 9.2  | 14.1 | B | 8.7  | 12.1 | 13.9 | <0.05           |
| Threonine      | A | 91.8 | 102.3 | 107.1 | B | 25.4 | 26.7 | 32.6 | B | 20.4 | 24.0 | 25.0 | <0.05           |
| Tryptophan     | A | 88.1 | 95.1  | 114.3 | B | 32.3 | 33.9 | 45.7 | B | 34.0 | 35.1 | 44.6 | <0.05           |
| Valine         | A | 73.8 | 101.6 | 125.4 | B | 31.2 | 38.3 | 41.3 | B | 35.7 | 41.1 | 49.0 | <0.05           |
| Mesaconic acid | A | 79.6 | 81.1  | 129.9 | B | 19.1 | 24.0 | 35.3 | C | 10.1 | 10.9 | 14.4 | <0.05           |

P7, P28, and P42; 7, 28, and 42 days of age, respectively. Q1, Q2, and Q3; lower quartile, median quartile, and upper quartile, respectively. KW, Kruskal-Wallis test; Different letters in the same line denote significantly different according to Steel-Dwass test ( $p < 0.05$ ). The unit for metabolites is the relative value. n=5 in each group.
