# Supplementary material for: Metabolism of Imidazole Dipeptides, Taurine, Branched-Chain Amino Acids, and Polyamines of the Breast Muscle Are Affected by Post-Hatch Development in Chickens
Source: MDPI journal article supplement (doi:10.3390/metabo12010086), 2022-01-17
Supplement: s1 [file s1]

**Table S3.** Metabolites increased during postnatal development in the breast muscle of chickens

|                           |   | P7   |      |       |    | P28   |        |         |   | P42     |         |         | KW              |
|---------------------------|---|------|------|-------|----|-------|--------|---------|---|---------|---------|---------|-----------------|
|                           |   | Q1   | Q2   | Q3    |    | Q1    | Q2     | Q3      |   | Q1      | Q2      | Q3      | <i>p</i> -value |
| Glycerol 3-phosphate      | B | 0.0  | 63.3 | 218.4 | A  | 884.4 | 1459.7 | 3994    | A | 811.7   | 992.3   | 3528    | <0.05           |
| Sedoheptulose 7-phosphate | B | 49.0 | 92.7 | 154.6 | AB | 63.3  | 2247.1 | 14820.6 | A | 13008.7 | 21601.3 | 91442.2 | <0.05           |
| Uric acid                 | B | 82.8 | 97.2 | 118.6 | AB | 128.4 | 141.0  | 192.2   | A | 146.8   | 162.7   | 232.6   | <0.05           |

P7, P28, and P42; 7, 28, and 42 days of age, respectively. Q1, Q2, and Q3; lower quartile, median quartile, and upper quartile, respectively. KW, Kruskal-Wallis test; Different letters in the same line denote significantly different according to Steel-Dwass test ( $p < 0.05$ ). The unit for metabolites is the relative value. n=5 in each group.
