# Supplementary material for: Metabolism of Imidazole Dipeptides, Taurine, Branched-Chain Amino Acids, and Polyamines of the Breast Muscle Are Affected by Post-Hatch Development in Chickens
Source: MDPI journal article supplement (doi:10.3390/metabo12010086), 2022-01-17
Supplement: s1 [file s1]

**Table S4.** Other metabolite levels during postnatal development in the breast muscle of chickens

|                         |   | P7   |       |       | P28 |       |       | P42   |    |       | KW              |       |       |
|-------------------------|---|------|-------|-------|-----|-------|-------|-------|----|-------|-----------------|-------|-------|
|                         |   | Q1   | Q2    | Q3    | Q1  | Q2    | Q3    | Q1    | Q2 | Q3    | <i>p</i> -value |       |       |
| 3-Hydroxypropionic acid | A | 78.3 | 107.8 | 117.8 | A   | 109.3 | 134.3 | 160   | A  | 127.5 | 173.3           | 187.9 | <0.05 |
| Dimethylglycine         | A | 80.3 | 104.6 | 117.4 | A   | 55.3  | 63.8  | 77.8  | A  | 58.9  | 59.8            | 74.1  | <0.05 |
| Fructose 6-phosphate    | A | 50.6 | 77    | 160.9 | A   | 19.2  | 36.8  | 96.2  | A  | 6.2   | 10.4            | 37.8  | <0.05 |
| Glucose 6-phosphate     | A | 55.3 | 79.9  | 154.8 | A   | 22.2  | 42.4  | 101.5 | A  | 5.5   | 11.4            | 40.1  | <0.05 |
| Hydroxylamine           | A | 91.7 | 94.4  | 111.1 | A   | 111.1 | 126.4 | 133.3 | A  | 97.9  | 110.7           | 113.5 | <0.05 |
| Lactic acid             | A | 95.6 | 99.0  | 104.9 | A   | 107.5 | 113.0 | 120.6 | A  | 103.2 | 106.9           | 118.3 | <0.05 |
| N-Acetylaspartic acid   | A | 81.6 | 100.3 | 118.2 | A   | 113.5 | 125.3 | 154.1 | A  | 122.6 | 139.6           | 144.1 | <0.05 |
| O-Phosphoethanolamine   | A | 67.1 | 87.1  | 139.3 | A   | 35.1  | 42.5  | 66.6  | A  | 31.9  | 40.4            | 58.6  | <0.05 |
| Oxalacetic acid         | A | 85.0 | 105.7 | 112.2 | A   | 119.1 | 133.1 | 136.2 | A  | 106.6 | 109.6           | 119.6 | <0.05 |
| Tagatose                | A | 27.5 | 93.3  | 175.9 | A   | 5.0   | 14.5  | 29.9  | A  | 0.9   | 15.3            | 36.5  | <0.05 |
| 2-Hydroxybutyric acid   |   | 68.6 | 108.6 | 127.1 |     | 95.3  | 187.6 | 212.9 |    | 147.6 | 178.7           | 240.8 | 0.055 |
| Glucose                 |   | 93.6 | 101.7 | 105.5 |     | 74.9  | 87.0  | 97.4  |    | 80.9  | 84.2            | 96.4  | 0.065 |
| Pyruvic acid            |   | 86.4 | 104.4 | 111.4 |     | 35.3  | 75.2  | 93.2  |    | 59.1  | 67.1            | 89.7  | 0.067 |
| Palmitic acid           |   | 97.0 | 98.8  | 103.6 |     | 105.7 | 114   | 139.9 |    | 101.4 | 114.3           | 120.9 | 0.085 |
| Inosine                 |   | 83.2 | 94.3  | 119.7 |     | 35.2  | 68.1  | 92.0  |    | 50.0  | 69.4            | 85.7  | 0.087 |
| Sucrose                 |   | 62.9 | 70.6  | 151.8 |     | 47.1  | 58.9  | 85.4  |    | 48.2  | 51.1            | 66.4  | 0.102 |
| Galacturonic acid       |   | 82.8 | 101.3 | 116.5 |     | 91.3  | 118.2 | 123.1 |    | 113.5 | 128.3           | 149.4 | 0.114 |
| Mannose 6-phosphate     |   | 50.1 | 78.8  | 160.5 |     | 34.4  | 63.0  | 101.1 |    | 7.1   | 23.2            | 56.2  | 0.114 |
| Phosphoric acid         |   | 95.8 | 99.5  | 104.5 |     | 71.8  | 113.6 | 120.7 |    | 103.2 | 106.8           | 118.6 | 0.141 |
| Succinic acid           |   | 75.1 | 105.6 | 122.1 |     | 93.1  | 155.9 | 194.6 |    | 59.3  | 83.8            | 119.3 | 0.141 |
| Oleic acid              |   | 47.8 | 71.3  | 166.5 |     | 0.1   | 7.9   | 100   |    | 5.5   | 8.1             | 66.0  | 0.145 |
| Adenosine               |   | 71.4 | 106.8 | 125.2 |     | 45.1  | 138.3 | 227.2 |    | 106.8 | 313.1           | 441.8 | 0.151 |
| Asparagine              |   | 61.4 | 79.1  | 149.0 |     | 34.5  | 64.7  | 87.4  |    | 26.6  | 46.0            | 76.6  | 0.151 |
| Oxalic acid             |   | 72.1 | 102.4 | 126.7 |     | 40.5  | 54.3  | 213.5 |    | 30.6  | 42.5            | 84.1  | 0.151 |
| Glycerol                |   | 81.6 | 98.7  | 119.0 |     | 27.9  | 62.4  | 97.1  |    | 69.6  | 97.9            | 110.5 | 0.179 |
| Ribose 5-phosphate      |   | 10.5 | 66.6  | 206.2 |     | 58.4  | 71.5  | 100.4 |    | 94.3  | 102.5           | 125.2 | 0.185 |
| Cystamine               |   | 75.5 | 95.2  | 126.9 |     | 111.1 | 153.7 | 169.8 |    | 98.6  | 121.6           | 147.9 | 0.208 |
| Boric acid              |   | 84.5 | 89.2  | 121   |     | 106.3 | 115.4 | 129.3 |    | 87.5  | 92.4            | 119.7 | 0.221 |
| Ethylhydracrylic acid   |   | 57.9 | 97.7  | 143.2 |     | 31.0  | 105.4 | 219.4 |    | 112.5 | 258.5           | 279.9 | 0.221 |

P7, P28, and P42; 7, 28, and 42 days of age, respectively. Q1, Q2, and Q3; lower quartile, median quartile, and upper quartile, respectively. KW, Kruskal-Wallis test; Different letters in the same line denote significantly different according to Steel-Dwass test ( $p < 0.05$ ). The unit for metabolites is the relative value. n=5 in each group.

Table S4. (continued)

|                                | P7   |       |       | P28   |       |        | P42   |       |        | KW              |
|--------------------------------|------|-------|-------|-------|-------|--------|-------|-------|--------|-----------------|
|                                | Q1   | Q2    | Q3    | Q1    | Q2    | Q3     | Q1    | Q2    | Q3     | <i>p</i> -value |
| Gluconic acid                  | 4.8  | 114.6 | 187.8 | 27.5  | 33.2  | 49.2   | 1.2   | 8.9   | 36.5   | 0.247           |
| 5'-Methylthioadenosine         | 34.5 | 51.1  | 189.9 | 29.9  | 814.6 | 1157.5 | 178   | 550.0 | 1907.4 | 0.275           |
| Aspartic acid                  | 89.5 | 99.4  | 110.8 | 81.8  | 93.5  | 100.7  | 89.2  | 90.4  | 92.4   | 0.31            |
| Stearic acid                   | 96.1 | 100.1 | 103.8 | 102.1 | 105.5 | 114.2  | 96.6  | 109.0 | 117.3  | 0.326           |
| 5-Methoxytryptamine            | 43.6 | 104.6 | 154   | 54.9  | 113.7 | 191.0  | 40.0  | 66.5  | 106.8  | 0.403           |
| Citraconic acid                | 59.0 | 66.2  | 157.9 | 42.5  | 129.0 | 400.5  | 99.9  | 109.8 | 143.5  | 0.403           |
| Monostearin                    | 89.3 | 105.3 | 108.1 | 88.4  | 107.0 | 123.7  | 103   | 107.1 | 136.2  | 0.403           |
| Urea                           | 76.9 | 95.7  | 125.2 | 29.2  | 90.1  | 105.2  | 65.4  | 68.9  | 92.2   | 0.403           |
| Adenine                        | 70.4 | 107.3 | 126   | 80.5  | 90.8  | 97.3   | 90.3  | 96.6  | 103.1  | 0.468           |
| 3-Aminopropanoic acid          | 58.3 | 104.7 | 139.3 | 98.7  | 121.8 | 169.7  | 63.8  | 98.8  | 148.7  | 0.472           |
| Uridine                        | 92.0 | 101.2 | 107.4 | 94.7  | 111.3 | 119.3  | 99.5  | 103.7 | 113.5  | 0.472           |
| Uracil                         | 84.9 | 102.6 | 113.8 | 92.6  | 113.9 | 126.3  | 93.1  | 100.9 | 103.3  | 0.527           |
| Creatinine                     | 66.3 | 99.4  | 134   | 79.3  | 111.3 | 154.1  | 92.9  | 122.0 | 145.9  | 0.533           |
| 2-Ketoadipic acid              | 33.7 | 109.6 | 161.5 | 3.9   | 30.1  | 129.2  | 3.8   | 23.8  | 132.7  | 0.543           |
| Glycolic acid                  | 70.8 | 102.9 | 127.8 | 98.2  | 109.3 | 120.5  | 101.2 | 111.8 | 149    | 0.613           |
| 2-Methyl-3-hydroxybutyric acid | 11.2 | 118.6 | 179.5 | 27.7  | 126.0 | 255.4  | 48.9  | 72.0  | 112.1  | 0.651           |
| Nicotinamide                   | 67.9 | 100.1 | 132.0 | 78.5  | 123.8 | 131.5  | 98.0  | 104.7 | 151.6  | 0.677           |
| Inosine monophosphate          | 82.3 | 87.0  | 124.2 | 82.2  | 107.4 | 1624.7 | 0.3   | 63.5  | 5211.1 | 0.691           |
| 3-Phosphoglyceric acid         | 84.5 | 90.3  | 120.4 | 70.5  | 89.3  | 800.4  | 47.3  | 81.3  | 557.4  | 0.733           |
| Hypoxanthine                   | 40.1 | 133.0 | 143.4 | 109.8 | 128.1 | 143.6  | 103.7 | 126.1 | 128.7  | 0.756           |
| 2-Aminoadipic acid             | 82.5 | 96.0  | 119.5 | 84.3  | 99.6  | 129.8  | 91.7  | 100.2 | 128.4  | 0.852           |
| 2-Keto-isovaleric acid         | 48.1 | 78.9  | 162.4 | 62.0  | 87.5  | 146.9  | 64.7  | 99.7  | 133.7  | 0.852           |
| Arabitol                       | 52.6 | 105.9 | 144.5 | 75.6  | 79.9  | 103    | 67.4  | 83.0  | 99.6   | 0.887           |

P7, P28, and P42; 7, 28, and 42 days of age, respectively. Q1, Q2, and Q3; lower quartile, median quartile, and upper quartile, respectively. KW, Kruskal-Wallis test; Different letters in the same line denote significantly different according to Steel-Dwass test ( $p < 0.05$ ). The unit for metabolites is the relative value. n=5 in each group.
