# Supplementary material for: Metabolism of Imidazole Dipeptides, Taurine, Branched-Chain Amino Acids, and Polyamines of the Breast Muscle Are Affected by Post-Hatch Development in Chickens
Source: MDPI journal article supplement (doi:10.3390/metabo12010086), 2022-01-17
Supplement: s1 [file s1]

**Table S9.** Nucleotide sequence of primers used in RT-qPCR analyses

| Gene             | GeneBank accession number | Primer sequence (5'→3')                           | Product size (bp) |
|------------------|---------------------------|---------------------------------------------------|-------------------|
| <i>CNDP1</i>     | XM_004935199.3            | GCTGGAAAACGTGACCCTTTCAC<br>CTGGCATAGCTCTTTTCAAGGC | 138bp             |
| <i>CARNMT1</i>   | KR998071.1                | TGCTTGCCAAGGAAATGAATGG<br>TGCTAAACTGATGAATCCAGGGA | 116bp             |
| <i>CARNS</i>     | NM_001172593.1            | GCCCACTGGATATGACTGTGTG<br>CACAGCACCATGGCACCT      | 100bp             |
| <i>CTH</i>       | XM_422542.5               | AGCCATTCCGTCTCCCTTG<br>TCAAGGAATCGACCCACAGC       | 111bp             |
| <i>BCKDH E1a</i> | AB035083.1                | ACCTCTTCTCCGATGTGTACCG<br>TCGTAGAGCTCCATGGGGTAAT  | 112bp             |
| <i>BCKDH E1b</i> | AB035084.1                | TTGGATTGGTATTGGAGTTGCT<br>AGAGCGGTAACGATACTTTGCTG | 125bp             |
| <i>BCAT1</i>     | XM_004937974.1            | CAGCAGTTCTGTGGCTATACG<br>AAGGTGGAGTTGCCAGTTCATT   | 115bp             |
| <i>ODC</i>       | NM_001167766.1            | GCCAGAGTTGCAAGTTGGTG<br>TGCCATGCTGGTCTTGACAT      | 129bp             |
| <i>AMD</i>       | NM_001012569.1            | CCACCTCTTACTGCAAGCA<br>TACTCCTGGTGGGAAGGCTT       | 124bp             |
| <i>INSR</i>      | XM_001233398.5            | GTCTGCTTTTCTCCCTCCACA<br>GACAACCAGTCAACTTGGCAAA   | 146bp             |
| <i>IGF1R</i>     | NM_205032.1               | GGCCATACGGATTGAGAAGAAC<br>TCGGAGGCTTATTTCCAACAAT  | 110bp             |
| <i>IRS1</i>      | XM_004951101.1            | GCATTGAGGAAACGGACTCACT<br>GGGGTAAGAAGGCAACATCTCC  | 120bp             |
| <i>IRS2</i>      | XM_425588.4               | ACTCGGACAGCTTCTTTCAT<br>GAACTCGGACAGCTCCTTTAGA    | 152bp             |
| <i>RPS17</i>     | NM_204217.1               | AAGCTGCAGGAGGAGGAGAGG<br>GGTTGGACAGGCTGCCGAAGT    | 136bp             |

Abbreviations: *CNDP1*: carnosine dipeptidase 1, *CARNMT*: carnosine N-methyltransferase, *CARNS*: carnosine synthase, *CTH*: cystathionine gamma-lyase, *BCKDH E1a*: branched-chain alpha-keto acid dehydrogenase E1-alpha subunit, *BCKDH E1b*: branched-chain alpha-keto acid dehydrogenase E1-beta subunit, *BCAT1*: branched chain amino-acid transaminase 1, *ODC*: ornithine decarboxylase, *AMD*: adenosylmethionine decarboxylase, *INSR*: insulin receptor, *IGF1R*: insulin-like growth factor 1 receptor, *IRS1*: insulin receptor substrate 1, *IRS2*: insulin receptor substrate 2, *RPS17*: ribosomal protein S17
