# Supplementary material for: Metabolism of Imidazole Dipeptides, Taurine, Branched-Chain Amino Acids, and Polyamines of the Breast Muscle Are Affected by Post-Hatch Development in Chickens
Source: MDPI journal article supplement (doi:10.3390/metabo12010086), 2022-01-17
Supplement: s1 [file s1]

**Table S1.** Metabolites quantified in the breast muscle and plasma of chickens

|                              |   | P7    |       |        |   | P28   |       |       |   | P42   |        |        | KW              |
|------------------------------|---|-------|-------|--------|---|-------|-------|-------|---|-------|--------|--------|-----------------|
|                              |   | Q1    | Q2    | Q3     |   | Q1    | Q2    | Q3    |   | Q1    | Q2     | Q3     | <i>p</i> -value |
| Breast muscle                |   |       |       |        |   |       |       |       |   |       |        |        |                 |
| Carnosine*                   | B | 4936  | 6753  | 7802   | A | 12178 | 14354 | 19862 | A | 13270 | 18060  | 22844  | <0.05           |
| Anserine*                    | A | 10660 | 14081 | 19360  | B | 31423 | 46199 | 55795 | B | 34417 | 40569  | 50172  | <0.05           |
| Balanine*                    |   | 94    | 111   | 127    |   | 156   | 171   | 194   |   | 64    | 175    | 200    | 0.054           |
| Total imidazole dipeptides*  | B | 16420 | 19501 | 27281  | A | 43760 | 68139 | 72141 | A | 51762 | 62307  | 67453  | <0.05           |
| Taurine*                     | A | 1355  | 1542  | 2106   | B | 313   | 374   | 443   | B | 311   | 433    | 537    | <0.05           |
| Plasma                       |   |       |       |        |   |       |       |       |   |       |        |        |                 |
| Carnosine**                  |   | 1.14  | 2.15  | 4.07   |   | 1.04  | 1.56  | 2.31  |   | 2.09  | 2.99   | 6.52   | 0.168           |
| Anserine**                   |   | 1.64  | 4.74  | 6.59   |   | 3.28  | 3.75  | 6.12  |   | 4.77  | 6      | 13.61  | 0.298           |
| Total imidazole dipeptides** |   | 2.79  | 7.39  | 10.41  |   | 4.32  | 5.31  | 8.42  |   | 7.84  | 8.41   | 19.74  | 0.176           |
| Taurine**                    |   | 17.6  | 61.15 | 151.78 |   | 20.51 | 34.37 | 105   |   | 98.75 | 145.31 | 158.48 | 0.131           |

P7, P28, and P42; 7, 28, and 42 days of age, respectively. Q1, Q2, and Q3; lower quartile, median quartile, and upper quartile, respectively. KW, Kruskal-Wallis test; Different letters in the same line denote significantly different according to Steel-Dwass test ( $p < 0.05$ ). \*The unit in the breast muscle is nmol/g. \*\*The unit in the plasma is  $\mu\text{M}$ . n=4-5 in each group.
