# Supplementary material for: Metabolism of Imidazole Dipeptides, Taurine, Branched-Chain Amino Acids, and Polyamines of the Breast Muscle Are Affected by Post-Hatch Development in Chickens
Source: MDPI journal article supplement (doi:10.3390/metabo12010086), 2022-01-17
Supplement: s1 [file s1]

**Table S7.** Other metabolite levels during postnatal development in the plasma of chickens

|                                |   | P7   |       |       | P28 |       |       | P42   |    |       | KW      |       |       |
|--------------------------------|---|------|-------|-------|-----|-------|-------|-------|----|-------|---------|-------|-------|
|                                |   | Q1   | Q2    | Q3    | Q1  | Q2    | Q3    | Q1    | Q2 | Q3    | p-value |       |       |
| 2-Methyl-3-hydroxybutyric acid | A | 80.5 | 98.4  | 120.3 | A   | 49.7  | 56.2  | 78.7  | A  | 52.7  | 68.7    | 86.6  | <0.05 |
| 5-Oxoproline                   | A | 90.6 | 100   | 109.4 | A   | 113.9 | 121   | 142.9 | A  | 104.3 | 115.5   | 147.5 | <0.05 |
| Aconitic acid                  | A | 90.8 | 97.1  | 110.6 | A   | 54.6  | 69.4  | 86.8  | A  | 54.8  | 78.2    | 88.0  | <0.05 |
| Cystine                        | A | 86.5 | 100.8 | 113.1 | A   | 38.2  | 55.1  | 75.9  | A  | 60.2  | 94.6    | 103.3 | <0.05 |
| Glucuronic acid                | A | 88.3 | 95.2  | 114.1 | A   | 90.9  | 98.0  | 103.5 | A  | 44.6  | 79.4    | 88.6  | <0.05 |
| Glycerol                       | A | 94.6 | 97.5  | 106.7 | A   | 105.3 | 115.9 | 118.2 | A  | 112.4 | 125.9   | 141.6 | <0.05 |
| Mannose                        | A | 80.3 | 96.7  | 121.3 | A   | 51.7  | 66.8  | 78    | A  | 26.5  | 27.8    | 58.9  | <0.05 |
| Threonine acid                 | A | 87.8 | 100.9 | 111.7 | A   | 77.4  | 79.7  | 84.7  | A  | 61.5  | 67.5    | 82.2  | <0.05 |
| Ureidopropionic acid           | A | 89.6 | 99.2  | 110.8 | A   | 130.6 | 146.4 | 163.5 | A  | 90.4  | 127.6   | 142.8 | <0.05 |
| Valine                         | A | 79.4 | 110.0 | 115.6 | A   | 48.8  | 54.2  | 77.3  | A  | 64.3  | 81.2    | 83.0  | <0.05 |
| Xylitol                        | A | 84.8 | 95.5  | 117.4 | A   | 56    | 68.4  | 78.5  | A  | 71.8  | 98.8    | 103.5 | <0.05 |
| Malic acid                     |   | 88.2 | 93.2  | 115.2 |     | 98.2  | 147.3 | 202.6 |    | 129.3 | 252.4   | 296.2 | 0.056 |
| Uric acid                      |   | 95.9 | 100.7 | 103.8 |     | 75.7  | 87.4  | 91.6  |    | 76.6  | 83.1    | 99.8  | 0.059 |
| Leucine                        |   | 83.3 | 103.5 | 114.9 |     | 56.9  | 62.1  | 85.5  |    | 75.3  | 88.3    | 94.4  | 0.061 |
| Proline                        |   | 90.5 | 99.8  | 109.6 |     | 50.1  | 76.0  | 88    |    | 64.7  | 77.2    | 101.8 | 0.061 |
| Tryptophan                     |   | 86.3 | 97.9  | 114.7 |     | 95.5  | 100.7 | 129.4 |    | 112.3 | 127.3   | 144.8 | 0.061 |
| Cystathionine                  |   | 78.5 | 110.8 | 116.1 |     | 52.1  | 59.4  | 90.6  |    | 39    | 47.0    | 70.8  | 0.075 |
| Methylmalonic acid             |   | 78.5 | 105.7 | 118.6 |     | 71.3  | 74.0  | 90.3  |    | 50.5  | 63.5    | 90.5  | 0.075 |
| Xanthine                       |   | 75.5 | 96.7  | 126.2 |     | 120.4 | 144.0 | 173.2 |    | 101.9 | 200.4   | 251.3 | 0.081 |
| 2-Aminobutyric acid            |   | 81.4 | 90.5  | 123.4 |     | 102.8 | 110.3 | 120.5 |    | 72.8  | 78.7    | 100.1 | 0.085 |
| Tyrosine                       |   | 87.7 | 95.0  | 114.8 |     | 90.3  | 114.7 | 138.3 |    | 117.1 | 138.7   | 153.9 | 0.085 |
| Uracil                         |   | 85.9 | 96.4  | 115.9 |     | 113.8 | 120.1 | 140.8 |    | 102.2 | 116.0   | 148.0 | 0.087 |
| Glutamine                      |   | 90.5 | 95.9  | 111.6 |     | 109.8 | 119.8 | 130.4 |    | 100.1 | 124.0   | 139.7 | 0.088 |
| Ribose                         |   | 87.4 | 102.4 | 111.4 |     | 110.9 | 119.4 | 126.7 |    | 80.4  | 101.9   | 125.8 | 0.088 |
| Xylose                         |   | 76.4 | 105.7 | 120.8 |     | 82.9  | 91.3  | 95.3  |    | 63.3  | 69.5    | 82.1  | 0.090 |
| 2-Ketoglutaric acid            |   | 85.1 | 102.4 | 113.6 |     | 108.4 | 126.6 | 137.8 |    | 99.1  | 115.3   | 127.4 | 0.105 |
| Sarcosine                      |   | 79.2 | 86.9  | 127.4 |     | 105.5 | 156.9 | 237.3 |    | 102.7 | 113.4   | 214.4 | 0.108 |
| Tagatose                       |   | 17.0 | 37.7  | 214.2 |     | 139.9 | 582.2 | 960.6 |    | 21.9  | 56.4    | 335.1 | 0.108 |
| Hypotaurine                    |   | 64.7 | 84.1  | 143.3 |     | 53.6  | 55.7  | 82.3  |    | 78.9  | 109.9   | 113.3 | 0.112 |

P7, P28, and P42; 7, 28, and 42 days of age, respectively. Q1, Q2, and Q3; lower quartile, median quartile, and upper quartile, respectively. KW, Kruskal-Wallis test; Different letters in the same line denote significantly different according to Steel-Dwass test ( $p < 0.05$ ). The unit for metabolites is the relative value. n=5 in each group.

Table S7. (continued)

|                        | P7   |       |       | P28   |       |        | P42   |       |        | KW              |
|------------------------|------|-------|-------|-------|-------|--------|-------|-------|--------|-----------------|
|                        | Q1   | Q2    | Q3    | Q1    | Q2    | Q3     | Q1    | Q2    | Q3     | <i>p</i> -value |
| Malonic acid           | 79.3 | 94.9  | 123.2 | 60.7  | 72.5  | 85.7   | 69.1  | 74.2  | 97.4   | 0.125           |
| 3-Aminoisobutyric acid | 86.9 | 89.9  | 118.1 | 68.1  | 75.9  | 99.5   | 57.9  | 59.4  | 92.1   | 0.137           |
| Acetoacetic acid       | 87.3 | 97.5  | 113.9 | 96.7  | 103.7 | 116.4  | 103   | 121.5 | 134.8  | 0.137           |
| Arabinose              | 75.0 | 86.1  | 132.0 | 66.6  | 70.0  | 121.1  | 57.6  | 66.3  | 78.2   | 0.141           |
| Lactic acid            | 91.3 | 101.3 | 108.1 | 105.9 | 110.6 | 112    | 98.3  | 101.1 | 115.7  | 0.141           |
| Methionine             | 77.7 | 97.7  | 123.4 | 77.8  | 86.7  | 99.8   | 95.8  | 117.8 | 138.6  | 0.141           |
| Urea                   | 83.9 | 90.3  | 121.0 | 76.6  | 80.0  | 89.4   | 67.1  | 82.6  | 94.9   | 0.145           |
| Arabitol               | 72.8 | 101.2 | 126.6 | 119.3 | 124.3 | 142.9  | 104.2 | 115.2 | 154.6  | 0.151           |
| 4-Hydroxyproline       | 81.0 | 88.7  | 124.7 | 62.9  | 65.7  | 83.9   | 64.0  | 67.9  | 125.6  | 0.160           |
| Isoleucine             | 87.2 | 95.5  | 115.1 | 65.5  | 70.7  | 92.4   | 70.7  | 85.3  | 95.1   | 0.164           |
| Benzoic acid           | 73   | 83.2  | 135.4 | 125   | 143.5 | 146.5  | 81.4  | 101.1 | 143.7  | 0.179           |
| Alanine                | 91.0 | 100.6 | 108.7 | 80.5  | 92.1  | 98.1   | 72.0  | 83.6  | 103.5  | 0.196           |
| Elaidic acid           | 66.2 | 95.0  | 136.3 | 56.9  | 71.0  | 90.9   | 25.3  | 65.1  | 89.8   | 0.196           |
| Threonine              | 89.6 | 96.9  | 112.0 | 80.4  | 91.5  | 101.6  | 74.6  | 85.9  | 98.8   | 0.208           |
| Monostearin            | 93.1 | 104   | 104.9 | 59.3  | 92.2  | 96.8   | 81.2  | 89.4  | 114.5  | 0.230           |
| Palmitic acid          | 91.4 | 104.3 | 106.4 | 89.4  | 92.7  | 98.2   | 68.9  | 87.6  | 111.5  | 0.230           |
| Galactose              | 0.0  | 51.7  | 224.1 | 34.2  | 100.4 | 6017.7 | 61.7  | 227.0 | 2867.9 | 0.28            |
| Mannose 6-phosphate    | 34.8 | 63.2  | 183.6 | 50.4  | 139.2 | 307.4  | 82.6  | 92.2  | 281.7  | 0.281           |
| Margaric acid          | 88.8 | 100.5 | 110.9 | 93.3  | 97.5  | 102.3  | 61.8  | 86.3  | 111.9  | 0.281           |
| 3-Hydroxybutyric acid  | 73.3 | 92.9  | 130.3 | 70.1  | 86.4  | 96.4   | 91.1  | 98.6  | 125.1  | 0.289           |
| Allose                 | 77.1 | 95.6  | 125.1 | 107.4 | 123.2 | 206.7  | 90    | 110.0 | 214.4  | 0.289           |
| Uridine                | 83.9 | 105.2 | 113.5 | 108.5 | 112.8 | 158.9  | 98.1  | 109.2 | 200.3  | 0.310           |
| Hydroxylamine          | 84.3 | 104.4 | 113.5 | 77.8  | 83.5  | 99.3   | 70.1  | 81.2  | 99     | 0.326           |
| Inositol phosphate     | 72.1 | 83.2  | 136.3 | 44.7  | 49.5  | 98.8   | 58.6  | 70.4  | 82.2   | 0.336           |
| Glucose                | 90.2 | 98.2  | 110.7 | 71.4  | 90.5  | 98.7   | 54.4  | 93.4  | 106.1  | 0.357           |
| Nonanoic acid          | 81.9 | 105.4 | 115.4 | 96.8  | 115.2 | 126.6  | 91.2  | 130.2 | 141.9  | 0.357           |
| Serine                 | 82.1 | 97.7  | 119   | 105.2 | 118.2 | 121.9  | 92.9  | 108.0 | 130.2  | 0.357           |
| Stearic acid           | 94.8 | 101.7 | 104.3 | 93.1  | 101.5 | 102.3  | 80.2  | 91.8  | 111.8  | 0.379           |
| 15-Anhydro-glucitol    | 64.6 | 79.0  | 145.9 | 32.7  | 47.9  | 128    | 32.8  | 54.1  | 101.7  | 0.395           |

P7, P28, and P42; 7, 28, and 42 days of age, respectively. Q1, Q2, and Q3; lower quartile, median quartile, and upper quartile, respectively. KW, Kruskal-Wallis test; Different letters in the same line denote significantly different according to Steel-Dwass test ( $p < 0.05$ ). The unit for metabolites is the relative value. n=5 in each group.

Table S7. (continued)

|                          | P7   |       |       | P28   |       |       | P42  |       |       | KW              |
|--------------------------|------|-------|-------|-------|-------|-------|------|-------|-------|-----------------|
|                          | Q1   | Q2    | Q3    | Q1    | Q2    | Q3    | Q1   | Q2    | Q3    | <i>p</i> -value |
| Citric acid              | 90.5 | 101.9 | 108.6 | 99.8  | 111.6 | 120.6 | 88.8 | 96.4  | 117.2 | 0.395           |
| Fructose 6-phosphate     | 1.6  | 87.8  | 204.5 | 43.6  | 104.5 | 446.1 | 10.1 | 24.3  | 117.0 | 0.395           |
| 3-Hydroxypropionic acid  | 91.9 | 100.1 | 108   | 97.0  | 101.5 | 103.6 | 89.9 | 93.5  | 106.2 | 0.403           |
| Glycolic acid            | 90.1 | 96.6  | 111.6 | 92.0  | 107.3 | 115.1 | 76.4 | 84.6  | 111.5 | 0.403           |
| Glycine                  | 87.5 | 92.7  | 116.2 | 77.5  | 91.0  | 107.3 | 87.7 | 109.2 | 132.3 | 0.445           |
| 2-Hydroxyisobutyric acid | 62.9 | 105.3 | 134.5 | 68.6  | 81.7  | 93.5  | 66.1 | 76.8  | 96.5  | 0.454           |
| Dopamine                 | 84.4 | 94.9  | 118.1 | 99.7  | 103.9 | 119.3 | 82.9 | 94.2  | 128.4 | 0.454           |
| Linoleic acid            | 65.2 | 105.0 | 132.3 | 62.2  | 70.7  | 107.2 | 53.3 | 74.8  | 101.4 | 0.454           |
| Norvaline                | 8.8  | 14.0  | 234.2 | 39.9  | 121.2 | 228.4 | 76.9 | 196.4 | 264.5 | 0.482           |
| Isomaltose               | 58.7 | 115.2 | 133.7 | 74.3  | 141.8 | 165.2 | 58.6 | 109   | 169.1 | 0.512           |
| Boric acid               | 85.2 | 91.8  | 118.9 | 92.5  | 100.8 | 111.9 | 72.4 | 87.0  | 113.9 | 0.527           |
| Adenosine                | 78.9 | 109.0 | 116.6 | 68.6  | 105.6 | 144.6 | 85.6 | 118.3 | 151.9 | 0.533           |
| Ascorbic acid            | 28.6 | 118.5 | 162.2 | 80.2  | 93.2  | 458.0 | 1.1  | 9.6   | 462.2 | 0.566           |
| Homocysteine             | 69.0 | 110.2 | 125.9 | 68.6  | 79.5  | 122.8 | 51.0 | 68.6  | 110.5 | 0.566           |
| Dihydroorotic acid       | 49.9 | 92.6  | 153.8 | 49.8  | 75.7  | 98.5  | 54.0 | 61.9  | 85.1  | 0.595           |
| 5-Methoxytryptamine      | 33.4 | 92.3  | 170.5 | 67.5  | 139.1 | 217.8 | 64.2 | 98.6  | 326.5 | 0.613           |
| Lysine                   | 72.4 | 111.8 | 121.8 | 92.8  | 101.0 | 114.2 | 63.5 | 102.7 | 107.0 | 0.613           |
| Myristic acid            | 88.6 | 99.9  | 111.4 | 93.9  | 94.1  | 100.0 | 68.1 | 91.3  | 114.7 | 0.613           |
| Ornithine                | 88.7 | 100.4 | 111.1 | 78.4  | 101.3 | 124.8 | 93.8 | 109.5 | 133.9 | 0.619           |
| N-Acetylmannosamine      | 81.7 | 104.2 | 116.2 | 96.1  | 106.3 | 124.9 | 42.2 | 89.8  | 129.4 | 0.691           |
| Asparagine               | 75.9 | 103.3 | 122.4 | 62.6  | 80.5  | 124.5 | 69.6 | 106.4 | 140.0 | 0.756           |
| Lactose                  | 70.0 | 117.3 | 121.4 | 75.3  | 105.1 | 131.0 | 44.3 | 94.4  | 124.7 | 0.779           |
| 3-Phenyllactic acid      | 72.9 | 105.0 | 124.6 | 102.6 | 107.5 | 112.3 | 86.4 | 104.8 | 133.3 | 0.811           |
| 4-Aminobutyric acid      | 89.6 | 105.3 | 107.7 | 98.8  | 103.0 | 105.9 | 93.5 | 96.9  | 106.7 | 0.811           |
| Sorbose                  | 77.2 | 101.1 | 122.3 | 91.1  | 102.6 | 114.3 | 50.3 | 78.0  | 128.0 | 0.811           |
| Cysteine                 | 62.0 | 105.4 | 135.3 | 98.9  | 115.3 | 143.9 | 92.7 | 106.4 | 148.7 | 0.827           |
| 2-Hydroxybutyric acid    | 85.5 | 93.0  | 118.0 | 87.2  | 96.0  | 113.5 | 81.2 | 108.0 | 120.5 | 0.990           |
| Cystamine                | 71.4 | 99.7  | 128.8 | 81.5  | 100.9 | 133.8 | 85.3 | 101.3 | 109.1 | 0.990           |

P7, P28, and P42; 7, 28, and 42 days of age, respectively. Q1, Q2, and Q3; lower quartile, median quartile, and upper quartile, respectively. KW, Kruskal-Wallis test; Different letters in the same line denote significantly different according to Steel-Dwass test ( $p < 0.05$ ). The unit for metabolites is the relative value. n=5 in each group.
