# Supplementary material for: Metabolism of Imidazole Dipeptides, Taurine, Branched-Chain Amino Acids, and Polyamines of the Breast Muscle Are Affected by Post-Hatch Development in Chickens
Source: MDPI journal article supplement (doi:10.3390/metabo12010086), 2022-01-17
Supplement: s1 [file s1]

**Table S5.** Metabolites decreased during postnatal development in the plasma of chickens

|                                |    | P7   |       |       |    | P28   |       |       |    | P42   |       |       | KW              |
|--------------------------------|----|------|-------|-------|----|-------|-------|-------|----|-------|-------|-------|-----------------|
|                                |    | Q1   | Q2    | Q3    |    | Q1    | Q2    | Q3    |    | Q1    | Q2    | Q3    | <i>p</i> -value |
| meso-Erythritol                | A  | 90.4 | 103.8 | 107.8 | A  | 72.4  | 83.5  | 86.1  | B  | 45    | 51.3  | 59.4  | <0.05           |
| 2-Hydroxy-3-methylvaleric acid | A  | 51.6 | 88.6  | 154.1 | AB | 20.0  | 41.4  | 62.6  | B  | 8.7   | 9.9   | 14.3  | <0.05           |
| Ribonic acid                   | A  | 53.8 | 96.0  | 148.2 | AB | 6.0   | 10.1  | 34.1  | B  | 1.1   | 3.7   | 30.9  | <0.05           |
| 2-Ketoisocaproic acid          | A  | 86.0 | 96.6  | 115.7 | B  | 58.3  | 70.6  | 75.0  | AB | 48.8  | 58.9  | 78.4  | <0.05           |
| Gluconic acid                  | A  | 86.8 | 101.0 | 112.7 | B  | 30.7  | 34.3  | 42.8  | AB | 45.6  | 51.1  | 71.3  | <0.05           |
| Inositol                       | A  | 94.2 | 98.0  | 106.8 | B  | 124.4 | 141.7 | 145.7 | AB | 88.2  | 112.1 | 145.6 | <0.05           |
| 2-Deoxytetronic acid           | A  | 72.4 | 94.4  | 130.4 | B  | 1.1   | 2.5   | 14.6  | B  | 0.0   | 0.7   | 19.9  | <0.05           |
| 2-Hydroxyisovaleric acid       | A  | 74.2 | 78.2  | 136.6 | B  | 28.3  | 37.4  | 54.0  | B  | 19.2  | 21.6  | 27.0  | <0.05           |
| 2-Keto-isovaleric acid         | A  | 71.9 | 97.0  | 129.6 | B  | 21.9  | 30.2  | 50.0  | B  | 16    | 27.1  | 48.9  | <0.05           |
| 3-Methyl-2-oxovaleric acid     | A  | 82.8 | 94.8  | 119.8 | B  | 41.5  | 54.7  | 65.0  | B  | 34.8  | 47    | 61.5  | <0.05           |
| Dimethylglycine                | A  | 88.0 | 101.1 | 111.5 | B  | 154.1 | 156.0 | 202.2 | B  | 145.1 | 159.7 | 191   | <0.05           |
| Galacturonic acid              | A  | 83.0 | 98.6  | 117.7 | B  | 20.3  | 33.2  | 45.3  | B  | 8.6   | 23.6  | 39.1  | <0.05           |
| Glucaric acid                  | A  | 85.7 | 90.0  | 119.3 | B  | 42.2  | 48.3  | 58.1  | B  | 24.5  | 34.6  | 51.2  | <0.05           |
| Lactitol                       | A  | 70.3 | 107.5 | 125.9 | B  | 16.5  | 27.3  | 34.6  | B  | 17.1  | 19.9  | 26.6  | <0.05           |
| Maltose                        | A  | 69.2 | 83.6  | 139.0 | B  | 28    | 60.3  | 65.0  | B  | 31.8  | 52.1  | 58.3  | <0.05           |
| Mannitol                       | A  | 76.2 | 99.4  | 124.1 | B  | 11.9  | 19.2  | 28.8  | B  | 5.8   | 9.4   | 17.8  | <0.05           |
| Phenylalanine                  | A  | 90.5 | 101.9 | 108.5 | B  | 49.5  | 50.4  | 68.8  | B  | 58.6  | 82.7  | 86.7  | <0.05           |
| Sucrose                        | A  | 67.9 | 83.5  | 140.3 | B  | 19.2  | 27.0  | 42    | B  | 14.5  | 16.1  | 33.4  | <0.05           |
| 3-Hydroxyisovaleric acid       | A  | 54.9 | 111.1 | 139.6 | B  | 19.6  | 21.6  | 25.6  | C  | 15.3  | 17.0  | 17.4  | <0.05           |
| Homocystine                    | A  | 74.4 | 109.5 | 120.8 | B  | 15.5  | 27.2  | 31.5  | C  | 4.9   | 6.3   | 7.9   | <0.05           |
| Threitol                       | AB | 87.7 | 100.9 | 111.8 | A  | 95.1  | 95.6  | 104.0 | B  | 55.7  | 65.2  | 80.2  | <0.05           |

P7, P28, and P42; 7, 28, and 42 days of age, respectively. Q1, Q2, and Q3; lower quartile, median quartile, and upper quartile, respectively. KW, Kruskal-Wallis test; Different letters in the same line denote significantly different according to Steel-Dwass test ( $p < 0.05$ ). The unit for metabolites is the relative value. n=5 in each group.
