# Supplementary material for: Metabolism of Imidazole Dipeptides, Taurine, Branched-Chain Amino Acids, and Polyamines of the Breast Muscle Are Affected by Post-Hatch Development in Chickens
Source: MDPI journal article supplement (doi:10.3390/metabo12010086), 2022-01-17
Supplement: s1 [file s1]

**Table S6.** Metabolites increased during postnatal development in the plasma of chickens

|                       |    | P7   |       |       | P28 |       |        | P42    |    |        | KW     |        |                 |
|-----------------------|----|------|-------|-------|-----|-------|--------|--------|----|--------|--------|--------|-----------------|
|                       |    | Q1   | Q2    | Q3    |     | Q1    | Q2     | Q3     |    | Q1     | Q2     | Q3     | <i>p</i> -value |
| Creatinine            | B  | 48.3 | 91.6  | 155.8 | A   | 652.5 | 691.7  | 785.2  | A  | 736.2  | 849.4  | 1151.3 | <0.05           |
| Glucose 6-phosphate   | B  | 75.7 | 97.8  | 125.4 | A   | 573.0 | 845.9  | 1166.4 | A  | 759.7  | 913.7  | 1171.0 | <0.05           |
| Glutamic acid         | B  | 87.4 | 102.7 | 111.3 | A   | 155.0 | 232.2  | 244.5  | A  | 188.5  | 228.9  | 291.6  | <0.05           |
| Glyceric acid         | B  | 85.9 | 96.0  | 116.0 | A   | 138.2 | 145.4  | 162.1  | A  | 142.6  | 157.8  | 183.7  | <0.05           |
| Glycerol 3-phosphate  | B  | 85.8 | 90.5  | 118.9 | A   | 218.9 | 271.3  | 344.7  | A  | 206.8  | 235.9  | 307.8  | <0.05           |
| Inosine               | B  | 53.8 | 102.7 | 144.8 | A   | 239.8 | 475.4  | 639.3  | A  | 318.9  | 582.4  | 719.5  | <0.05           |
| Norepinephrine        | B  | 37.8 | 93.3  | 165.6 | A   | 942.3 | 1731.7 | 3291.4 | A  | 1506.4 | 1761.4 | 2176.2 | <0.05           |
| O-Phosphoethanolamine | B  | 75.8 | 101.4 | 123.5 | A   | 361.4 | 507.0  | 580.9  | A  | 363.2  | 400.9  | 507.4  | <0.05           |
| Phosphoric acid       | B  | 80.6 | 96.5  | 121.2 | A   | 156.0 | 172.2  | 191.6  | A  | 160.6  | 167.5  | 205.2  | <0.05           |
| Pyruvic acid          | B  | 83.1 | 102.4 | 115.7 | A   | 168.4 | 178.9  | 208.5  | A  | 146.7  | 157.1  | 192.7  | <0.05           |
| Succinic acid         | B  | 60.0 | 81.1  | 149.5 | A   | 413.7 | 1073.6 | 2542.0 | A  | 1230.6 | 2329.9 | 5170.9 | <0.05           |
| 2-Aminoethanol        | B  | 92.6 | 103.1 | 105.9 | A   | 117.5 | 124.4  | 145.0  | AB | 80.4   | 114.6  | 124.7  | <0.05           |
| Fucose                | B  | 89.9 | 92.9  | 113.6 | A   | 121.3 | 126.4  | 140.9  | AB | 107.5  | 119.0  | 134.0  | <0.05           |
| Tricarballic acid     | B  | 66.3 | 107.0 | 130.2 | A   | 193.1 | 260.5  | 718.8  | AB | 136.5  | 170.7  | 422.2  | <0.05           |
| Fumaric acid          | B  | 91.9 | 102.6 | 106.8 | AB  | 108.7 | 139.7  | 196.2  | A  | 161.2  | 278.2  | 352.7  | <0.05           |
| Guanosine             | B  | 46.6 | 89.7  | 158.5 | AB  | 106.0 | 261.0  | 294.7  | A  | 220.6  | 265.8  | 361.4  | <0.05           |
| Hypoxanthine          | B  | 70.1 | 78.0  | 140.9 | AB  | 203.0 | 322.2  | 368.7  | A  | 227.5  | 343.1  | 371.9  | <0.05           |
| Psicose               | AB | 74.9 | 95.9  | 127.1 | B   | 66.4  | 79.4   | 89.6   | A  | 146.5  | 176.0  | 259.5  | <0.05           |

P7, P28, and P42; 7, 28, and 42 days of age, respectively. Q1, Q2, and Q3; lower quartile, median quartile, and upper quartile, respectively. KW, Kruskal-Wallis test; Different letters in the same line denote significantly different according to Steel-Dwass test ( $p < 0.05$ ). The unit for metabolites is the relative value. n=5 in each group.
