# Supplementary material for: Metabolism of Imidazole Dipeptides, Taurine, Branched-Chain Amino Acids, and Polyamines of the Breast Muscle Are Affected by Post-Hatch Development in Chickens
Source: Metabolites. 2022 Jan 17;12(1):86. doi: 10.3390/metabo12010086 (PMC8778354; doi:10.3390/metabo12010086)
Supplement: Supplementary file 1 [file metabolites-12-00086-s001.zip]

Archive with 10 entries (10 files):
- Data.xlsx
- Table S1 Metabolites quantified in the breast muscle and plasma.pdf
- Table S2 Metabolites decreased in the breast muscle.pdf
- Table S3 Metabolites increased in the breast muscle.pdf
- Table S4 Other metabolites in the breast muscle.pdf
- Table S5 Metabolites decreased in the plasma.pdf
- Table S6 Metabolites increased in the plasma.pdf
- Table S7 Other metabolites in the plasma.pdf
- Table S8 LC-MSMS conditions.pdf
- Table S9 Primers for PCR.pdf
