# Supplementary material for: Metabolism of Imidazole Dipeptides, Taurine, Branched-Chain Amino Acids, and Polyamines of the Breast Muscle Are Affected by Post-Hatch Development in Chickens
Source: Metabolites. 2022 Jan 17;12(1):86. doi: 10.3390/metabo12010086 (PMC8778354; doi:10.3390/metabo12010086)
Supplement: Supplementary file 1 [file metabolites-12-00086-s001.zip › Data.xlsx]

## Sheet: Growth parameters
ID	age	Initial body weight (g)	Final body weight (g)	Breast muscle weight (g)	Liver weight (g)	Brain weight (g)
1	P07	69.7	69.7	1.15	3.11	1.17
2	P07	60.2	60.2	0.87	2.91	1.13
3	P07	66.6	66.6	1.41	2.63	1.18
4	P07	67.8	67.8	1.08	2.94	1.15
5	P07	98.1	98.1	1.28	2.6	1.15
6	P28	66.4	336.5	11.33	8.77	2.09
7	P28	65.9	342.5	11.2	10.98	2.16
8	P28	69.8	341	10.29	8.52	2.05
9	P28	67.2	334	10.47	9.25	1.99
10	P28	70.2	337	12.72	9.61	2.08
11	P42	68.2	680	20.83	16.54	2.46
12	P42	75.3	640	18.73	16.97	2.55
13	P42	69.6	640	20.04	14.52	2.62
14	P42	72	630	20.67	14.79	2.5
15	P42	62	580	23.06	15.46	2.46

## Sheet: Plasma Metabolomics
ID	age	15-Anhydro-glucitol	2-Aminobutyric acid	2-Aminoethanol	2-Deoxytetronic acid	2-Hydroxy-3-methylvaleric acid	2-Hydroxybutyric acid	2-Hydroxyisobutyric acid	2-Hydroxyisovaleric acid	2-Ketoglutaric acid	2-Ketoisocaproic acid	2-Keto-isovaleric acid	2-Methyl-3-hydroxybutyric acid	3-Aminoisobutyric acid	3-Hydroxybutyric acid	3-Hydroxyisovaleric acid	3-Hydroxypropionic acid	3-Methyl-2-oxovaleric acid	3-Phenyllactic acid	4-Aminobutyric acid	4-Hydroxyproline	5-Methoxytryptamine	5-Oxoproline	Acetoacetic acid	Aconitic acid	Adenosine	Alanine	Allose	Arabinose	Arabitol	Ascorbic acid	Asparagine	Benzoic acid	Boric acid	Citric acid	Creatinine	Cystamine	Cystathionine	Cysteine	Cystine	Dihydroorotic acid	Dimethylglycine	Dopamine	Elaidic acid	Fructose 6-phosphate	Fucose	Fumaric acid	Galactose	Galacturonic acid
1	P07	51.6669	90.4752	93.8862	77.3948	73.9092	93.0291	78.9707	78.2314	117.746	80.2675	66.5103	92.9882	88.8945	77.9093	70.0804	85.8362	84.4824	91.5539	87.8624	88.7295	113.779	99.9584	85.6866	102.661	108.959	88.0405	92.1458	79.5573	66.3845	27.6499	72.3565	77.9392	84.7033	101.928	91.6276	99.6718	110.804	97.8605	100.777	144.236	101.148	120.74	113.182	117.846	92.9374	102.619	51.7283	100.104
2	P07	96.7676	78.9503	103.899	94.4359	88.6017	81.7978	46.8107	77.7901	84.0332	96.5589	77.2516	67.9829	84.9223	68.7174	39.7587	106.076	81.1277	54.1586	106.498	97.834	43.782	107.135	117.015	95.113	50.9444	100.562	62.0722	70.3817	79.3143	29.4825	103.307	88.1894	104.517	104.219	53.4267	97.6055	107.941	26.1008	105.72	92.6175	107.032	78.5491	95.0215	3.2444	88.6135	96.5666	366.506	98.5604
3	P07	79.0359	115.59	107.847	67.4095	29.2985	89.2544	151.748	70.7097	109.54	104.554	112.897	100.001	133.074	116.053	112.94	109.979	111.048	119.343	108.883	81.3833	92.3214	111.626	97.5275	97.1332	121.99	110.749	95.5946	131.993	107.863	118.474	125.383	83.2361	85.7047	90.5874	144.834	140.061	116.316	138.925	120.572	163.301	91.5739	115.474	85.518	87.8286	117.886	104.418	0	76.2397
4	P07	77.5037	83.8243	91.2212	115.422	106.717	105.423	105.307	149.628	86.2355	91.6979	97.0116	98.3662	103.224	92.8702	111.056	100.13	94.8425	129.917	105.349	80.5184	227.189	82.9988	88.9768	86.4613	106.805	93.9306	138.453	86.1173	101.192	199.244	79.4627	68.0475	91.8197	90.3203	166.858	45.1933	48.9769	105.398	97.1396	50.9885	84.3277	90.3325	46.9224	291.081	91.2567	87.1407	81.7655	89.7942
5	P07	195.026	131.16	103.147	145.338	201.473	130.496	117.164	123.641	102.445	126.921	146.33	140.662	89.8845	144.45	166.166	97.9789	128.5	105.027	91.4075	151.535	22.9291	98.2817	110.794	118.632	111.302	106.718	111.735	131.951	145.246	125.15	119.491	182.588	133.255	112.946	43.2538	117.468	115.963	131.716	75.7919	48.8572	115.919	94.9043	159.356	0	109.307	109.255	0	135.301
6	P28	47.9259	112.594	124.292	2.47184	41.3632	125.818	81.656	37.4179	143.953	66.4913	27.4793	70.0322	69.6143	101.528	23.0898	96.8445	47.1279	113.372	104.99	88.837	213.623	148.313	93.9833	42.4295	34.8398	92.1429	110.193	69.5609	145.513	84.6691	89.2946	147.626	88.2614	121.115	691.705	100.86	57.4861	126.096	55.0619	75.7086	155.013	103.852	71.0257	104.469	141.985	251.639	100.443	33.1876
7	P28	41.3611	107.669	134.048	26.3725	67.1421	101.18	68.4141	48.7377	126.595	70.606	30.1581	56.1863	66.6359	86.424	21.6456	103.055	54.6695	111.175	102.968	65.6867	222.061	120.998	103.747	69.3633	156.037	85.7522	123.15	142.76	120.039	75.6642	69.7026	143.547	105.214	103.514	758.244	77.8034	66.9098	98.985	45.5786	68.8832	172.74	100.72	97.3902	47.729	121.986	140.798	5969.37	21.3478
8	P28	24.047	97.9336	110.764	1.40649	15.8012	89.2132	91.8525	26.6187	121.038	50.1821	16.3734	46.4875	97.2243	77.6522	17.9509	104.194	35.819	107.502	106.86	64.2634	81.2797	109.727	99.4684	66.7039	105.635	75.3172	148.979	99.4958	118.498	619.102	55.5849	145.329	100.842	111.641	670.113	163.023	46.6457	115.255	30.7748	118.326	153.247	118.331	45.7995	172.318	139.737	111.682	6066.04	19.3024
9	P28	116.101	128.38	124.379	2.7921	58.0312	95.9836	68.7983	59.2665	131.629	79.2174	59.3156	87.4434	101.676	91.3558	28.0298	97.214	74.1535	100.092	102.673	78.9383	139.096	137.413	121.162	89.2402	102.367	102.556	264.506	69.9721	140.301	93.1804	159.747	131.174	96.6884	120.064	812.193	104.549	114.302	161.632	95.2353	78.6442	231.662	120.333	68.0498	39.3827	126.361	139.656	58.0589	56.0594
10	P28	139.995	110.334	155.959	0.819443	24.1764	85.2383	95.1076	29.99	95.8254	70.7758	40.6295	52.8247	75.9441	62.4809	21.1883	101.545	55.8876	105.18	94.8513	61.5432	53.7249	118.13	111.711	84.3379	133.224	93.5768	104.671	63.621	124.327	296.987	80.5104	118.825	118.493	95.9858	634.795	85.1284	59.4384	98.8969	56.5116	30.6357	156.016	98.7293	84.347	719.957	120.68	105.619	10.4335	34.5585
11	P42	54.1345	67.0083	83.5629	23.1513	8.75813	81.0989	64.2601	20.9185	114.317	44.0411	15.5186	48.9422	56.681	89.389	14.9759	96.4027	31.574	111.009	98.3676	66.8208	98.6335	98.5505	121.503	56.2905	56.5492	73.5213	106.168	66.2939	114.034	0	65.0762	163.485	102.794	83.9949	689.423	98.7655	46.9748	93.2306	60.5353	61.8501	146.172	76.9507	65.1435	4.52098	119.023	203.088	324.786	24.5906
12	P42	39.743	78.6733	77.2102	16.7313	12.0361	107.968	93.4666	25.4874	115.274	53.552	16.462	91.2519	59.1492	98.623	17.0099	87.0751	38.0735	88.0574	95.8571	126.384	80.9404	109.971	99.1648	78.1946	114.597	70.4276	147.153	65.3048	115.191	396.361	74.1847	123.919	86.9546	96.4283	849.359	114.877	46.2179	106.389	99.1044	85.0205	144.103	88.9147	37.681	24.2651	120.373	392.905	97.3308	23.5605
13	P42	25.881	100.75	118.849	0.73976	9.85442	113.446	76.8365	21.6192	124.886	58.9072	27.1051	68.7444	59.3801	99.7824	17.5323	92.7821	46.9756	84.6821	91.1879	67.8811	47.4077	134.482	122.301	80.9897	118.317	91.215	73.8869	71.1187	140.688	527.999	126.652	84.5852	79.0933	111.138	1060.13	71.8377	62.4955	116.575	94.6345	61.5835	177.637	102.017	12.8815	15.6548	108.088	312.471	5411.06	11.65
14	P42	69.3683	78.7086	114.615	0	8.72313	81.3817	67.8691	17.4913	83.7888	69.5143	49.1711	56.5185	78.4901	92.7125	15.5598	93.4566	62.7822	104.803	96.8914	61.1644	250.886	115.469	106.793	53.3149	124.322	83.581	109.998	49.8546	94.2681	9.60756	106.405	78.2054	65.6692	93.5615	782.958	101.293	31.758	92.0795	59.8014	85.144	159.739	94.2381	73.1188	95.2917	107.002	119.311	26.0327	5.55726
15	P42	134.071	99.4658	130.608	0	16.481	127.65	99.4726	28.5979	129.816	87.212	48.6699	81.9528	105.778	150.512	17.2956	116.055	60.1658	155.665	115.039	124.909	402.106	160.44	147.387	95.0937	179.488	115.712	281.61	85.3037	168.543	2.10742	153.427	101.077	124.918	123.307	1242.45	103.352	79.1079	180.905	107.422	46.4419	204.388	154.869	106.51	138.656	147.578	278.209	227.016	53.6128
The unit is a relative value.
[truncated: 77 more columns]

## Sheet: Breast muscle Metabolomics
ID	age	15-Anhydro-glucitol	2-Aminoadipic acid	2-Aminobutyric acid	2-Hydroxybutyric acid	2-Ketoadipic acid	2-Keto-isovaleric acid	2-Methyl-3-hydroxybutyric acid	3-Aminopropanoic acid	3-Hydroxybutyric acid	3-Hydroxypropionic acid	3-Phosphoglyceric acid	4-Hydroxyproline	5-Methoxytryptamine	5'-Methylthioadenosine	5-Oxoproline	Adenine	Adenosine	Alanine	Arabitol	Arginine	Ascorbic acid	Asparagine	Aspartic acid	Boric acid	Citraconic acid	Citric acid	Creatinine	Cystamine	Cystathionine	Dimethylglycine	Ethylhydracrylic acid	Fructose 6-phosphate	Fumaric acid	Galactose	Galacturonic acid	Gluconic acid	Glucose 6-phosphate	Glucose	Glutamic acid	Glutamine	Glyceric acid	Glycerol 3-phosphate	Glycerol	Glycine	Glycolic acid	Homocysteine	Homocystine	Hydroxylamine
1	P07	181.086	138.327	149.438	66.4037	190.29	219.528	22.4709	152.508	154.885	124.472	124.129	142.523	177.335	266.985	118.741	144.057	86.8617	115.58	143.314	146.431	83.0413	153.792	80.4748	140.156	66.1718	111.631	147.949	157.334	202.584	122.996	97.6802	76.9746	128.323	127.327	101.25	230.227	79.9053	107.573	103.574	98.3351	153.388	63.2969	117.438	98.5689	102.876	141.011	243.816	92.9867
2	P07	47.157	96.0072	60.9957	70.7561	132.677	105.301	196.797	126.088	94.1169	65.7993	116.677	100.183	104.617	51.1227	104.565	80.5936	56.0045	105.625	74.7155	114.202	134.159	144.212	105.478	83.1798	62.8483	108.109	120.045	95.1734	53.3695	104.566	154.307	52.1384	117.292	99.9328	114.2	9.69434	54.6404	103.411	116.768	122.792	101.088	334.568	120.604	124.203	143.3	81.4033	69.6844	99.9699
3	P07	93.5581	100.595	91.8696	124.036	109.605	78.8857	0	104.72	93.4332	90.7395	90.0307	70.8275	130.76	112.865	84.6204	60.1865	108.426	85.2889	145.677	98.9689	95.1815	66.4998	98.5435	101.769	85.7762	98.1367	99.419	96.453	57.8263	85.2138	86.4249	113.744	68.4911	87.5384	118.878	114.643	125.613	97.4105	88.9881	70.7571	116.69	0	85.641	120.408	112.315	91.0469	56.0768	122.265
4	P07	137.973	76.0244	87.9698	108.645	64.6654	53.361	162.127	52.4985	77.0055	107.762	78.8932	95.7576	42.2882	26.3574	114.833	107.871	141.922	94.7681	105.864	57.0456	101.795	79.1268	116.152	89.1744	55.0802	86.5097	68.395	71.4649	131.794	111.886	29.4035	49.0351	89.1613	111.185	65.1426	145.435	55.8975	101.735	113.261	129.272	66.7098	0	98.6795	90.8557	59.3457	83.7118	78.7482	94.4199
5	P07	40.2251	89.0469	109.726	130.16	2.76327	42.9244	118.606	64.1853	80.5598	111.228	90.2701	90.7088	45.0005	42.6696	77.2407	107.292	106.786	98.738	30.4296	83.352	85.8226	56.369	99.3519	85.7203	230.124	95.6133	64.1922	79.5751	54.4261	75.3372	132.185	208.108	96.7323	74.0165	100.529	0	183.944	89.8709	77.4091	78.8439	62.1243	102.135	77.6379	65.9649	82.1636	102.827	51.6749	90.358
6	P28	31.1494	143.175	57.0987	84.8191	126.119	191.234	38.4693	143.116	50.0203	101.078	73.8147	27.6073	225.799	1374.61	38.8698	83.9138	0	23.4795	96.2418	17.065	52.6336	106.732	79.8493	133.84	84.9219	64.2573	165.999	135.703	0.113413	82.9533	52.21	7.33155	29.5395	55.8034	120.949	51.5694	8.6295	87.0259	35.8647	22.4389	46.8325	842.505	106.593	26.0173	123.79	3.45984	3.62066	130.292
7	P28	31.6351	116.436	41.9304	105.784	132.371	102.517	16.8959	111.793	93.3214	134.284	67.1948	20.8441	113.68	814.578	30.5062	94.7383	90.2093	17.622	76.2689	28.086	50.6836	68.0953	83.7473	115.368	0	73.9496	142.252	185.229	0.474234	63.7577	105.395	128.225	27.1847	73.865	93.5701	29.29	134.385	98.6375	27.8308	21.911	96.3148	926.378	39.687	12.5807	117.237	7.55832	2.34126	110.745
8	P28	21.5865	80.8912	48.1689	187.565	30.1066	87.511	277.583	196.373	45.3436	117.55	89.2505	26.3676	156.187	940.377	38.9085	99.8111	138.304	18.871	109.714	15.4941	48.696	64.6953	99.4963	112.191	128.988	85.6222	78.2655	153.663	0.255206	72.7347	258.726	64.1599	44.5372	66.2758	118.191	46.8556	68.7009	96.1693	45.5824	25.8793	54.3514	1459.73	62.4128	17.8209	98.1204	4.20757	13.3998	136.375
9	P28	13.3852	87.7495	49.6201	213.303	7.16692	67.2703	125.986	85.6663	65.7431	156.995	648.563	18.3889	50.3496	2.50188	27.3512	77.0069	204.785	19.4805	79.8653	18.4057	51.0218	40.4449	101.892	124.814	201.239	76.865	111.267	86.4714	0.744342	56.3692	180.126	31.1401	45.9123	40.2037	125.31	33.1851	35.7337	73.3341	32.2859	17.4802	52.7777	3816.46	87.6974	17.1744	109.3	5.77971	6.05383	126.377
10	P28	23.1374	99.5644	44.3281	212.471	0.715475	56.7504	233.293	121.76	55.6336	163.059	952.159	17.3926	59.477	57.2964	27.7789	90.8494	249.688	15.1763	75.0178	21.9673	42.5278	28.6348	93.538	100.346	599.662	66.3589	80.3268	154.439	0.387646	54.2721	9.73571	36.8033	35.6646	46.1258	88.9639	25.6362	42.4421	76.4836	30.4684	16.8838	33.8276	4171.5	16.1364	17.4023	98.2985	3.05553	0	111.361
11	P42	13.9593	97.3122	44.5982	133.064	184.384	159.945	33.4271	98.7501	55.5875	135.608	46.079	29.8153	66.5031	2561.29	40.2369	97.2091	536.427	20.5483	110.967	24.2705	63.6783	94.2541	88.8051	111.439	125.232	66.0432	162.893	142.41	0.243619	81.6034	297.413	10.4467	27.6747	64.0175	168.079	2.34573	11.4131	100.435	41.7676	20.527	36.3472	959.362	116.265	28.4109	156.006	2.84124	4.1744	113.168
12	P42	18.6461	123.613	33.7587	162.038	80.966	107.416	110.332	64.2451	67.6852	119.336	91.0134	16.3503	38.7396	1253.58	32.0049	96.5621	313.089	18.1743	78.5395	12.8552	43.0764	58.8599	89.555	90.5036	109.828	67.6836	128.918	121.587	0.550754	66.6037	258.465	3.92164	46.3835	60.7578	130.751	8.93056	4.21749	92.4647	28.5623	19.657	32.673	992.334	67.0867	27.7786	107.545	1.8439	5.18256	113.894
13	P42	6.10395	133.122	37.1535	178.74	23.7964	99.6513	113.952	63.411	43.6409	177.489	81.3321	19.315	41.2344	1.97673	32.2345	84.4752	118.72	15.4396	88.1568	17.6223	54.2495	46.0204	90.4424	92.4202	107.256	73.4233	121.971	153.305	0.415721	59.8313	75.2333	24.3214	43.9871	53.9183	128.254	47.1575	24.045	81.7666	34.4449	15.3716	21.0505	663.962	104.659	17.1173	94.8305	2.57618	8.12585	93.138
14	P42	15.223	86.0811	35.2752	208.045	6.46505	69.4129	64.3217	112.956	69.3398	198.232	48.537	26.8556	68.2595	549.981	28.0159	96.1035	94.8524	16.3327	83.0482	23.0643	45.0956	28.6763	90.4841	127.986	92.6331	67.0868	114.07	116.5	0.196679	58.9532	262.437	8.51679	43.9334	50.7318	115.637	25.926	6.74998	80.096	31.0771	15.3669	22.1791	1330.95	97.8551	34.2439	111.795	1.72214	10.2459	110.676
15	P42	23.8054	100.214	41.963	273.539	1.15214	59.9972	71.993	184.513	67.4901	173.305	1023.8	19.7164	145.286	354.1	29.187	108.964	347.212	18.0147	56.1645	13.6841	51.675	24.4952	94.335	84.5295	161.707	60.4504	71.6632	80.7753	0	58.8392	149.76	51.2454	52.632	53.8694	111.395	0	56.2083	84.1936	36.2232	15.497	35.9065	5724.98	72.213	17.3888	142.084	11.7743	12.7981	102.721
The unit is a relative value.
[truncated: 55 more columns]

## Sheet: Imidazole dipeptides taurine
ID	age	breast muscle Taurine	breast muscle Carnosine	breast muscle Anserine	breast muscle Balenine	breast muscle imidazole dipeptides sum	plasma Taurine	plasma Carnosine	plasma Anserine	plasma imidazole dipeptides sum
1	P07	1889.65	4542.62	9420.93	111.434	14075	24.9834	1.54358	3.28351	4.82709
2	P07	2322.74	8839	20315.3	140.267	29294.5	10.2227	0.745935	0	0.745935
3	P07	1450.91	5329.33	14081	90.4562	19500.8	230.874	5.00033	7.93699	12.9373
4	P07	1541.83	6764.5	18404.7	97.5633	25266.8	61.1473	2.15231	5.23801	7.39032
5	P07	1258.9	6753.34	11898.4	114.13	18765.9	72.6785	3.13857	4.73988	7.87845
6	P28	436.695	13656.7	25680.7	146.274	39483.7	147.666	1.73286	5.98314	7.716
7	P28	309.189	10699.5	37165.1	170.721	48035.4	62.3326	2.87753	6.2527	9.13024
8	P28	449.88	21773.8	46199.3	165.55	68138.7	33.2891	0.936867	3.21495	4.15182
9	P28	317.766	17949.9	54225.9	185.117	72360.8	7.74081	1.55784	3.75325	5.31109
10	P28	374.286	14353.7	57363.9	203.649	71921.3	34.3697	1.1399	3.34865	4.48856
11	P42	432.708	18060	40568.7	175.268	58804	134.065	2.41037	5.33202	7.74239
12	P42	514.247	15797.9	28795.2	127.335	44720.5	86.9753	3.56744	4.58383	8.15127
13	P42	277.07	10741.8	51565.6	0	62307.4	156.558	7.50881	15.9198	23.4286
14	P42	345.819	24189.1	40039.4	178.546	64407.1	159.127	1.98483	6.67713	8.66196
15	P42	559.628	21498.6	48778.9	220.602	70498.1	ND	ND	ND	ND
The unit in the breast muscle is nmol/g.
The unit in the plasma is μM.

## Sheet: mRNA
ID	age	CARNS	CNDP	CARNMT	BCAT	BCKDH E1a	BCKDH E1b	INSR	IGF1R	IRS1	IRS2	ODC	AMD	CTH
1	P07	93.7075	42.7992	101.51	125.352	114.166	130.925	103.439	117.27	128.653	132.616	81.2702	88.8523	113.259
2	P07	82.9403	61.1103	80.2812	109.249	88.1704	87.4284	122.72	118.21	83.3617	71.9062	128.068	105.579	85.9285
3	P07	127.976	152.986	106.354	91.7876	116.106	107.559	97.1692	96.7476	101.995	104.789	74.9986	116.3	101.196
4	P07	75.3014	197.998	86.518	80.4113	94.4114	92.8602	98.5233	82.5505	99.7874	97.2639	101.059	77.4548	86.7041
5	P07	120.075	45.1059	125.337	93.2003	87.1464	81.2277	78.1493	85.2214	86.2032	93.4255	114.604	111.813	112.912
6	P28	115.702	37.4097	150.393	83.7854	165.936	82.3958	144.386	114.329	177.668	118.19	95.4581	102.798	154.417
7	P28	137.754	52.747	151.002	112.727	136.204	59.7778	153.741	127.036	198.222	145.512	80.4843	123.638	134.28
8	P28	132.864	43.2789	147.985	80.9502	140.952	95.9611	165.679	138.841	219.426	157.308	71.1033	93.8253	215.101
9	P28	121.999	15.1193	141.629	94.6537	146.082	100.816	167.157	133.969	213.528	208.103	93.5136	104.103	195.473
10	P28	107.961	33.2168	142.109	77.8616	105.49	77.0904	142.165	111.945	179.869	113.859	83.2188	93.0194	139.152
11	P42	128.405	84.9685	141.828	49.3609	106.848	90.8345	219.898	135.574	224.182	169.215	75.0963	105.379	153.102
12	P42	150.177	9.64427	170.015	45.5581	116.404	99.8927	184.923	119.037	202.627	305.127	90.3836	89.9708	222.539
13	P42	135.355	6.3467	170.765	48.6684	152.738	76.7607	229.63	147.818	227.69	208.223	89.4301	129.806	158.342
14	P42	133.098	10.796	190.904	56.1938	111.311	78.2926	166.002	146.48	204.36	145.228	100.932	156.531	162.278
15	P42	135.925	22.7913	144.066	63.9453	126.743	73.8763	201.67	154.599	209.994	184.4	104.799	111.298	178.153
The unit is a relative value.
